# Supplementary material for: Accurate high throughput quantification of selenium in biological samples – the potential of combining isotope dilution ICP-tandem mass spectrometry with flow injection
Source: Royal Society of Chemistry journal article supplement (doi:10.1039/c6ja00209a), 2016-01-01

**Supporting Information to**  
**Accurate high throughput quantification of selenium in biological samples-**  
**the potential of combining isotope dilution ICP-tandem mass spectrometry**  
**with flow injection**

Luca Bamonti<sup>a</sup>, Sarah Theiner<sup>b,c</sup>, Nataliya Rohr-Udilova<sup>d</sup>, Bernhard K. Keppler<sup>b,c</sup>, Gunda Koellensperger<sup>a\*</sup>

<sup>a</sup> Institute of Analytical Chemistry, Waehringer Strasse 38, 1090 Vienna, University of Vienna, Austria

<sup>b</sup> Institute of Inorganic Chemistry, Waehringer Strasse 42, 1090 Vienna, University of Vienna, Austria

<sup>c</sup> ‘Translational Cancer Research Platform’, Institute of Inorganic Chemistry, Waehringer Strasse 42, 1090 Vienna, University of Vienna, Austria

<sup>d</sup> Department for Gastroenterology and Hepatology, Internal Medicine III, Medical University of Vienna, Waehringer Guertel 18-20, 1090 Vienna, Austria

**Table S1.** Precision for each Se isotope ratio is determined from a CRM blend by four consecutive measurements in H<sub>2</sub> and O<sub>2</sub> -ICP-MS/MS mode. CRM blends were prepared and digested as described in the experimental section.

| Precision of isotope ratios from CRM blend |                                    |                                    |                                    |                                    |                                    |
|--------------------------------------------|------------------------------------|------------------------------------|------------------------------------|------------------------------------|------------------------------------|
| Gas                                        | H <sub>2</sub>                     |                                    | O <sub>2</sub>                     |                                    |                                    |
| CRM blend                                  | <sup>78</sup> Se/ <sup>77</sup> Se | <sup>80</sup> Se/ <sup>77</sup> Se | <sup>78</sup> Se/ <sup>77</sup> Se | <sup>80</sup> Se/ <sup>77</sup> Se | <sup>82</sup> Se/ <sup>77</sup> Se |
| Average (n=4)                              | 0.26                               | 0.59                               | 0.24                               | 0.54                               | 0.10                               |
| STDEV                                      | 0.003                              | 0.006                              | 0.003                              | 0.002                              | 0.002                              |
| RSD [%]                                    | 1.13                               | 1.11                               | 1.11                               | 0.35                               | 1.96                               |
| Mass Bias [%]                              | 3.87                               | 12.6                               | 2.64                               | 13.9                               | 17.6                               |

**Figure S1. (1)** Isotope dilution equation employed for calculating concentration of selenium in direct infusion. The concentration of the spike ( $C_{spk}$ ) was calculated by reverse IDMS, whereas ( $W_{spk}$ ) and ( $W_{std}$ ) respectively refer to the weights of spike and standard.  $R$  refers to the ratio reference-to-enriched isotope into the blend. ( $h_y$ ) refers to the abundance of the enriched isotope while ( $h_x$ ) is the IUPAC correspondent abundance. **(2)** Equation employed for calculating the analyte mass flow ( $M_x(t)$ ). **(3)** The mass flow of the spike ( $M_y(t)$ ) was assessed by multiplying  $C_{spk}$  with the make-up flow rate ( $f_{sp}$ ) **(4)** Selenium concentration was calculated by dividing absolute amounts ( $M_{xj}$ ) as integrated between  $t1$  and  $t2$ , through the injection volume ( $IV$ ). **(5)** ( $K$ ) Mass bias correction was calculated in external calibration: a  $100 \mu\text{g L}^{-1}$  Se-standard was measured 7 times consecutively and the true ratio ( $R_{true}$ ) was divided by the observed ratio ( $R_{obs}$ ).

(1)

$$C = \frac{C_{spk} * W_{spk}}{W_{std}} * \frac{R_y - R_b * K}{K * R_b - R_x} * \frac{h_{iy}}{h_{ix}}$$

(2)

$$M_x(t) = M_y(t) * \frac{R_y - R_b * K}{K * R_b - R_x} * \frac{h_{iy}}{h_{ix}}$$

(3)

$$M_y(t) = f_{sp} * C_{spk}$$

(4)

$$C = \frac{\int_{t1}^{t2} M_{xj}}{IV}$$

(5)

$$K = \frac{R_{true}}{R_{obs}}$$

**Table S2.** Table reporting value/unit and respective standard uncertainties for each factor included in the TCU. Quantification parameters as well as variables are reported in model equation (1).

| H <sub>2</sub> mode                                             |                  |                                 |                      |                                 |                      |                                 |                      |
|-----------------------------------------------------------------|------------------|---------------------------------|----------------------|---------------------------------|----------------------|---------------------------------|----------------------|
| Quantification parameter                                        | Variables        | <sup>78</sup> Se                |                      | <sup>80</sup> Se                |                      | <sup>82</sup> Se                |                      |
|                                                                 |                  | Value/unit                      | Standard uncertainty | Value/unit                      | Standard uncertainty | Value/unit                      | Standard uncertainty |
| Weight of spike                                                 | W <sub>spk</sub> | 198.2 mg                        | 0.002                | 198.2 mg                        | 0.002                | 198.2 mg                        | 0.002                |
| Weight of CRM/serum                                             | W <sub>crm</sub> | 182.65 mg                       | 0.002                | 182.65 mg                       | 0.002                | 182.65 mg                       | 0.002                |
| Concentration of isotopically enriched <sup>77</sup> Se "spike" | C <sub>spk</sub> | 0.67 μmol L <sup>-1</sup> (n=5) | 0.026                | 0.68 μmol L <sup>-1</sup> (n=5) | 0.024                | 0.71 μmol L <sup>-1</sup> (n=5) | 0.041                |
| Isotopic abundance of the reference isotope in the spike        | A <sub>spk</sub> | 0.3 % (certificate)             | 0.020                | 0.2 % (certificate)             | 0.020                | 0.2 % (certificate)             | 0.020                |
| Isotopic abundance of the enriched isotope in the spike         | B <sub>spk</sub> | 99.2 % (certificate )           | 0.020                | 99.2 % (certificate)            | 0.020                | 99.2 % (certificate)            | 0.020                |
| Isorope ratio in the test blend                                 | R <sub>b</sub>   | 0.219 (n=5)                     | 0.003                | 0.500 (n=5)                     | 0.006                | 0.097 (n=5)                     | 0.002                |
| Mass bias                                                       | K                | 1.08 (n=7)                      | 0.005                | 0.986 (n=7)                     | 0.005                | 0.935 (n=7)                     | 0.006                |

  

| O <sub>2</sub> mode                                             |                  |                                 |                      |                                 |                      |                                 |                      |
|-----------------------------------------------------------------|------------------|---------------------------------|----------------------|---------------------------------|----------------------|---------------------------------|----------------------|
| Quantification parameter                                        | Variables        | <sup>78</sup> Se                |                      | <sup>80</sup> Se                |                      | <sup>82</sup> Se                |                      |
|                                                                 |                  | Value/unit                      | Standard uncertainty | Value/unit                      | Standard uncertainty | Value/unit                      | Standard uncertainty |
| Weight of spike                                                 | W <sub>spk</sub> | 200.04 mg                       | 0.002                | 200.04 mg                       | 0.002                | 200.04 mg                       | 0.002                |
| Weight of CRM/serum                                             | W <sub>crm</sub> | 191.93 mg                       | 0.002                | 191.93 mg                       | 0.002                | 191.93 mg                       | 0.002                |
| Concentration of isotopically enriched <sup>77</sup> Se "spike" | C <sub>spk</sub> | 0.77 μmol L <sup>-1</sup> (n=5) | 0.039                | 0.79 μmol L <sup>-1</sup> (n=5) | 0.018                | 0.85 μmol L <sup>-1</sup> (n=5) | 0.074                |
| Isotopic abundance of the reference isotope in the spike        | A <sub>spk</sub> | 0.3 % (certificate)             | 0.020                | 0.2 % (certificate)             | 0.020                | 0.2 % (certificate)             | 0.020                |
| Isotopic abundance of the enriched isotope in the spike         | B <sub>spk</sub> | 99.2 % (certificate )           | 0.020                | 99.2 % (certificate)            | 0.020                | 99.2 % (certificate)            | 0.020                |
| Isorope ratio in the test blend                                 | R <sub>b</sub>   | 0.204 (n=5)                     | 0.003                | 0.491 (n=5)                     | 0.002                | 0.085 (n=5)                     | 0.002                |
| Mass bias                                                       | K                | 1.05 (n=7)                      | 0.004                | 0.913 (n=7)                     | 0.003                | 0.85 (n=7)                      | 0.003                |

**Figure S2.** Uncertainty budget “pies”: each pie illustrates the contribution brought to respectively  $^{78}\text{Se}$ ,  $^{80}\text{Se}$ ,  $^{82}\text{Se}$  in either gas mode as given by I- Weight of spike. II- Weight of CRM. III- Concentration of selenium in spike. IV- Isotopic abundance of reference isotope in spike. V- Isotopic abundance of enriched isotope in spike. VI- Blend isotope ratio. VII- Mass bias.

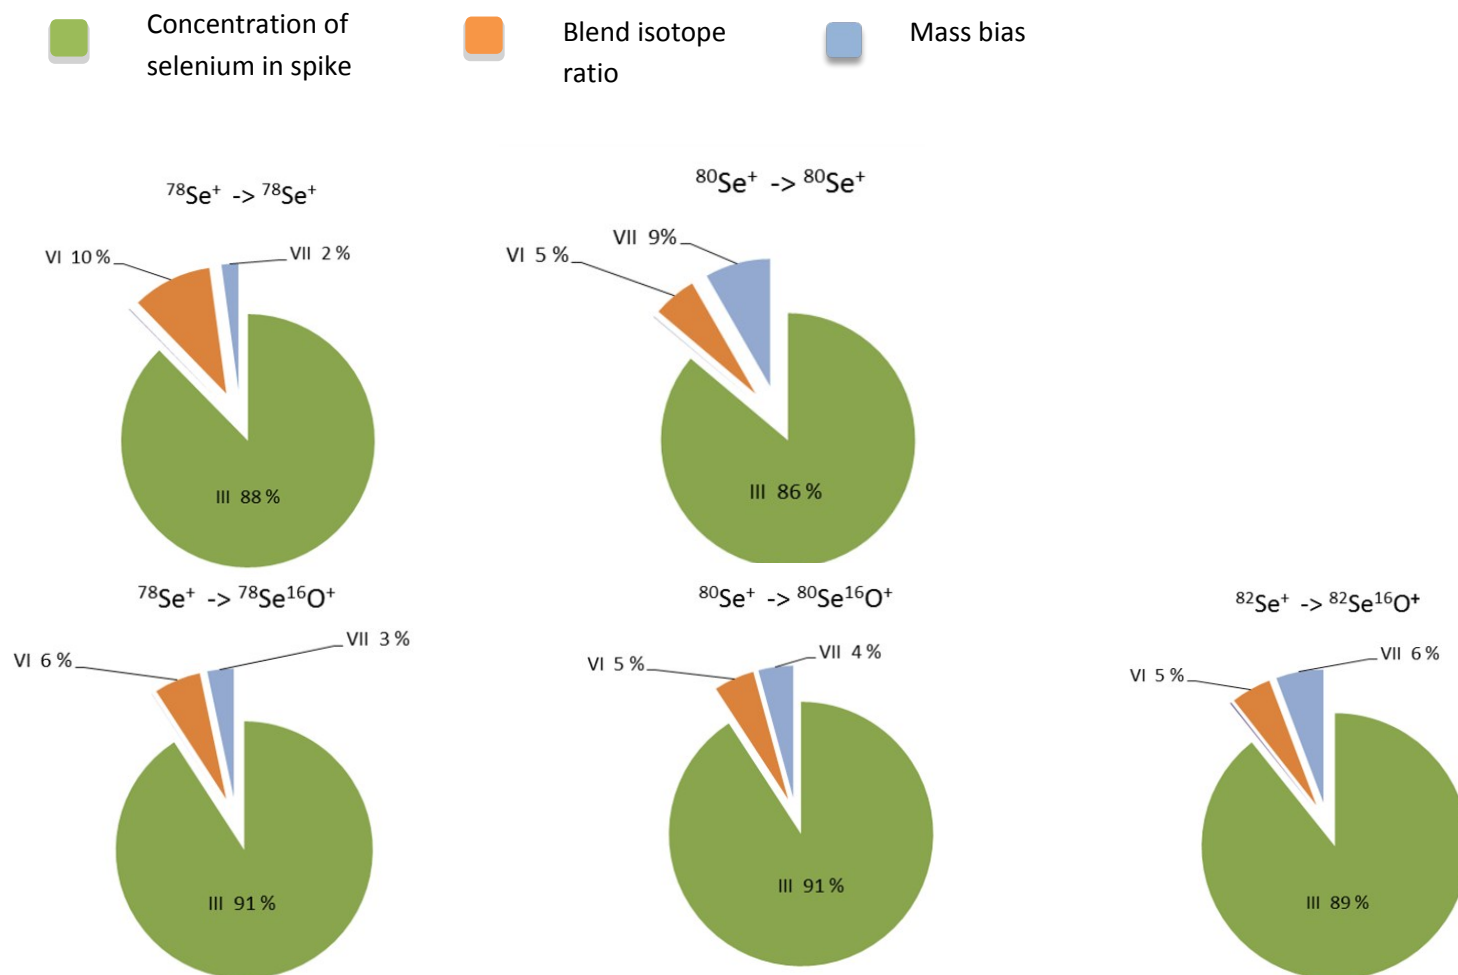

Supplement: c6ja00209a1.pdf [file c6ja00209a1.pdf]
